# Supplementary material for: Non-linear Relationship between Uric Acid to Albumin Ratio and Mortality in Pediatric Intensive Care Unit Patients: A Large-Scale Observational Study
Source: Research Square preprint supplement (doi:10.21203/rs.3.rs-7328002/v1), 2025-09-23
Supplement: Supplementary file 1 [file 925c7fb2d065b531e8f69fff.docx]

**Table S1 Missing Number (%) for Included Variables in Dataset**

| **variables** | **Missing (%)** |
| --- | --- |
| PTT (sec) | 694 (10.38%) |
| INR | 685 (10.25%) |
| PT (sec) | 655 (9.80%) |
| Neutrophil count (10⁹/L) | 179 (2.68%) |
| Monocyte count (10⁹/L) | 179 (2.68%) |
| Lymphocyte count (10⁹/L) | 178 (2.66%) |
| IBIL (μmol/L) | 156 (2.33%) |
| Total bilirubin (μmol/L) | 153 (2.29%) |
| Glucose (mmol/L) | 136 (2.03%) |
| TG (mmol/L) | 102 (1.53%) |
| Cholesterol total (mmol/L) | 102 (1.53%) |
| LDH (U/L) | 102 (1.53%) |
| RDW (%) | 98 (1.47%) |
| RBC (10¹²/L) | 93 (1.39%) |
| PLT (10⁹/L) | 93 (1.39%) |
| Hemoglobin (g/L) | 93 (1.39%) |
| HCT (%) | 93 (1.39%) |
| Lactate (mmol/L) | 53 (0.79%) |
| Bicarbonate (mmol/L) | 51 (0.76%) |
| Sodium (mmol/L) | 50 (0.75%) |
| Potassium (mmol/L) | 50 (0.75%) |
| Calcium (mmol/L) | 50 (0.75%) |
| Chloride (mmol/L) | 50 (0.75%) |
| DBIL (μmol/L) | 45 (0.67%) |
| Globulin (g/L) | 5 (0.07%) |
| Urea (mmol/L) | 3 (0.04%) |
| Creatinine (μmol/L) | 2 (0.03%) |
| ALT (U/L) | 1 (0.01%) |
| AST (U/L) | 1 (0.01%) |

**Abbreviations:** ALT, alanine aminotransferase; AST, aspartate aminotransferase; DBIL, direct bilirubin; HCT, hematocrit; IBIL, indirect bilirubin; INR, international normalized ratio; LDH, lactate dehydrogenase; PLT, platelet count; PT, prothrombin time; PTT, partial thromboplastin time; RBC, red blood cell; RDW, red cell distribution width; TG, triglyceride.

**Table S2 Univariate logistic regression analysis**

| **variables** | ***P*** | **OR (95% CI)** |
| --- | --- | --- |
| Age(years) | 0.415 | 0.99 (0.96 ~ 1.02) |
| Gender |  |  |
| Female |  | 1.00 (Reference) |
| Male | **0.010** | 1.36 (1.08 ~ 1.72) |
| Congenital malformation of heart |  |  |
| No |  | 1.00 (Reference) |
| Yes | 0.125 | 1.46 (0.90 ~ 2.35) |
| Pneumonia |  |  |
| No |  | 1.00 (Reference) |
| Yes | **<.001** | 2.61 (1.89 ~ 3.61) |
| Sepsis |  |  |
| No |  | 1.00 (Reference) |
| Yes | **<.001** | 3.97 (2.40 ~ 6.57) |
| Preterm infants |  |  |
| No |  | 1.00 (Reference) |
| Yes | 0.210 | 0.41 (0.10 ~ 1.66) |
| UA (mg/dL) | **<.001** | 1.212 (1.179 ~ 1.246) |
| Alb(g/dL) | **<.001** | 0.486 (0.411 ~ 0.575) |
| UAR | **<.001** | 1.76 (1.63 ~ 1.90) |
| WBC (10⁹/L) | **0.012** | 1.01 (1.01 ~ 1.01) |
| Neutrophil count (10⁹/L) | 0.314 | 0.99 (0.96 ~ 1.01) |
| Lymphocyte count (10⁹/L) | **<.001** | 1.15 (1.10 ~ 1.20) |
| Monocyte count (10⁹/L) | **<.001** | 0.47 (0.33 ~ 0.67) |
| RBC (10¹²/L) | 0.229 | 0.91 (0.77 ~ 1.06) |
| PLT (10⁹/L) | **<.001** | 0.99 (0.99 ~ 0.99) |
| Hemoglobin (g/L) | 0.188 | 1.00 (0.99 ~ 1.00) |
| RDW (%) | **<.001** | 1.10 (1.06 ~ 1.15) |
| HCT (%) | 0.406 | 1.01 (0.99 ~ 1.03) |
| Sodium (mmol/L) | **<.001** | 1.07 (1.05 ~ 1.09) |
| Potassium (mmol/L) | **<.001** | 2.12 (1.78 ~ 2.52) |
| Calcium (mmol/L) | **<.001** | 0.00 (0.00 ~ 0.01) |
| Chloride (mmol/L) | **<.001** | 0.95 (0.92 ~ 0.97) |
| Bicarbonate (mmol/L) | **<.001** | 0.86 (0.83 ~ 0.89) |
| Lactate (mmol/L) | **<.001** | 1.40 (1.35 ~ 1.45) |
| PT (sec) | **0.025** | 0.65 (0.45 ~ 0.95) |
| PTT (sec) | **<.001** | 1.03 (1.02 ~ 1.03) |
| INR | **<.001** | 2.71 (2.25 ~ 3.27) |
| TG (mmol/L) | **<.001** | 1.15 (1.10 ~ 1.21) |
| Cholesterol total (mmol/L) | 0.602 | 0.97 (0.88 ~ 1.07) |
| DBIL (μmol/L) | **0.002** | 1.01 (1.01 ~ 1.01) |
| IBIL (μmol/L) | 0.509 | 1.00 (0.99 ~ 1.00) |
| ALT (U/L) | **<.001** | 1.01 (1.01 ~ 1.01) |
| AST (U/L) | **<.001** | 1.01 (1.01 ~ 1.01) |
| Globulin (g/L) | 0.122 | 0.99 (0.97 ~ 1.00) |
| Glucose (mmol/L) | **<.001** | 1.15 (1.12 ~ 1.19) |
| LDH (U/L) | **<.001** | 1.01 (1.01 ~ 1.01) |
| Creatinine (μmol/L) | 0.186 | 1.00 (1.00 ~ 1.00) |
| Urea (mmol/L) | **<.001** | 1.06 (1.04 ~ 1.07) |
| Cystatin C (mg/L) | **<.001** | 1.74 (1.53 ~ 1.98) |

**Abbreviations:** ALB, albumin; ALT, alanine aminotransferase; AST, aspartate aminotransferase; DBIL, direct bilirubin; HCT, hematocrit; IBIL, indirect bilirubin; ICU, intensive care unit; INR, international normalized ratio; LDH, lactate dehydrogenase; PLT, platelet count; PT, prothrombin time; PTT, partial thromboplastin time; RBC, red blood cell; RDW, red cell distribution width; TG, triglyceride; UA, uric acid; UAR, uric acid to albumin ratio; WBC, white blood cell.

**Table S3 The variance inflation factor test**

| **variables** 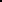 | ***P*** | **OR (95% CI)** | **VIF** |
| --- | --- | --- | --- |
| Gender |  |  |  |
| Female |  | 1.00 (Reference) |  |
| Male | **0.029** | 1.342 (1.031 ~ 1.746) | 1.013 |
| Pneumonia |  |  |  |
| No |  | 1.00 (Reference) |  |
| Yes | **<.001** | 2.416 (1.654 ~ 3.529) | 1.122 |
| Sepsis |  |  |  |
| No |  | 1.00 (Reference) |  |
| Yes | 0.054 | 1.883 (0.989 ~ 3.586) | 1.052 |
| UAR | **<.001** | 1.232 (1.093 ~ 1.388) | 1.940 |
| WBC (10⁹/L) | 0.564 | 0.999 (0.996 ~ 1.002) | 1.083 |
| Lymphocyte count (10⁹/L) | 0.939 | 0.998 (0.936 ~ 1.063) | 1.380 |
| Monocyte count (10⁹/L) | **0.019** | 0.670 (0.480 ~ 0.936) | 1.142 |
| PLT (10⁹/L) | 0.834 | 1.000 (0.999 ~ 1.001) | 1.252 |
| RDW (%) | 0.120 | 1.041 (0.990 ~ 1.095) | 1.126 |
| Sodium (mmol/L) | **<.001** | 1.104 (1.069 ~ 1.141) | 1.948 |
| Potassium (mmol/L) | **0.009** | 1.300 (1.069 ~ 1.582) | 1.257 |
| Calcium (mmol/L) | **<.001** | 0.054 (0.017 ~ 0.172) | 1.324 |
| Chloride (mmol/L) | **<.001** | 0.930 (0.899 ~ 0.962) | 2.415 |
| Bicarbonate (mmol/L) | 0.661 | 0.991 (0.950 ~ 1.033) | 1.899 |
| Lactate (mmol/L) | **<.001** | 1.204 (1.138 ~ 1.274) | 1.882 |
| PT (sec) | 0.540 | 0.875 (0.571 ~ 1.341) | 1.058 |
| PTT (sec) | 0.772 | 1.001 (0.993 ~ 1.010) | 1.531 |
| INR | 0.467 | 1.123 (0.822 ~ 1.533) | 1.707 |
| TG (mmol/L) | 0.384 | 1.030 (0.964 ~ 1.101) | 1.093 |
| DBIL (μmol/L) | **0.013** | 1.004 (1.001 ~ 1.007) | 1.161 |
| ALT (U/L) | 0.216 | 1.000 (0.999 ~ 1.000) | 5.257 |
| AST (U/L) | 0.789 | 1.000 (1.000 ~ 1.000) | 6.745 |
| Glucose (mmol/L) | **<.001** | 1.082 (1.045 ~ 1.121) | 1.174 |
| Urea (mmol/L) | 0.156 | 0.976 (0.943 ~ 1.009) | 2.289 |
| Cystatin C (mg/L) | 0.359 | 1.120 (0.879 ~ 1.426) | 1.969 |
| LDH (U/L) | 0.205 | 1.000 (1.000 ~ 1.000) | 2.466 |

**Notes:**

(1) Univariate binary logistic regression was used to select variables with P < 0.1 for inclusion in the subsequent adjusted models; (2) Due to the calculation formulas for the UAR (UAR = UA / Alb), age, UA, and Alb were excluded as variables.(3) All retained variables demonstrated minimal multicollinearity, with each variance inflation factor remaining below 5; (4) The final model retained the following variables: gender, pneumonia(yes/no), monocyte count, sodium, potassium, calcium, lactate, DBIL, and glucose.

**Abbreviations:** ALT, Alanine Aminotransferase; AST, Aspartate Aminotransferase; DBIL, Direct Bilirubin; HCT, Hematocrit; IBIL, Indirect Bilirubin; INR, International Normalized Ratio; LDH, Lactate Dehydrogenase; PLT, Platelet Count; PT, Prothrombin Time; PTT, Partial Thromboplastin Time; RBC, Red Blood Cell; RDW, Red Cell Distribution Width; TG, Triglyceride; UAR, Uric Acid to Albumin Ratio; WBC, White Blood Cell.
